# Supplementary material for: Plant Biostimulants Enhance Bud Break in Vitis vinifera Crimson Seedless
Source: Preprints.org preprint supplement (doi:10.20944/preprints202404.0286.v1), 2024-04-03
Supplement: Supplementary file 1 [file supplementary]

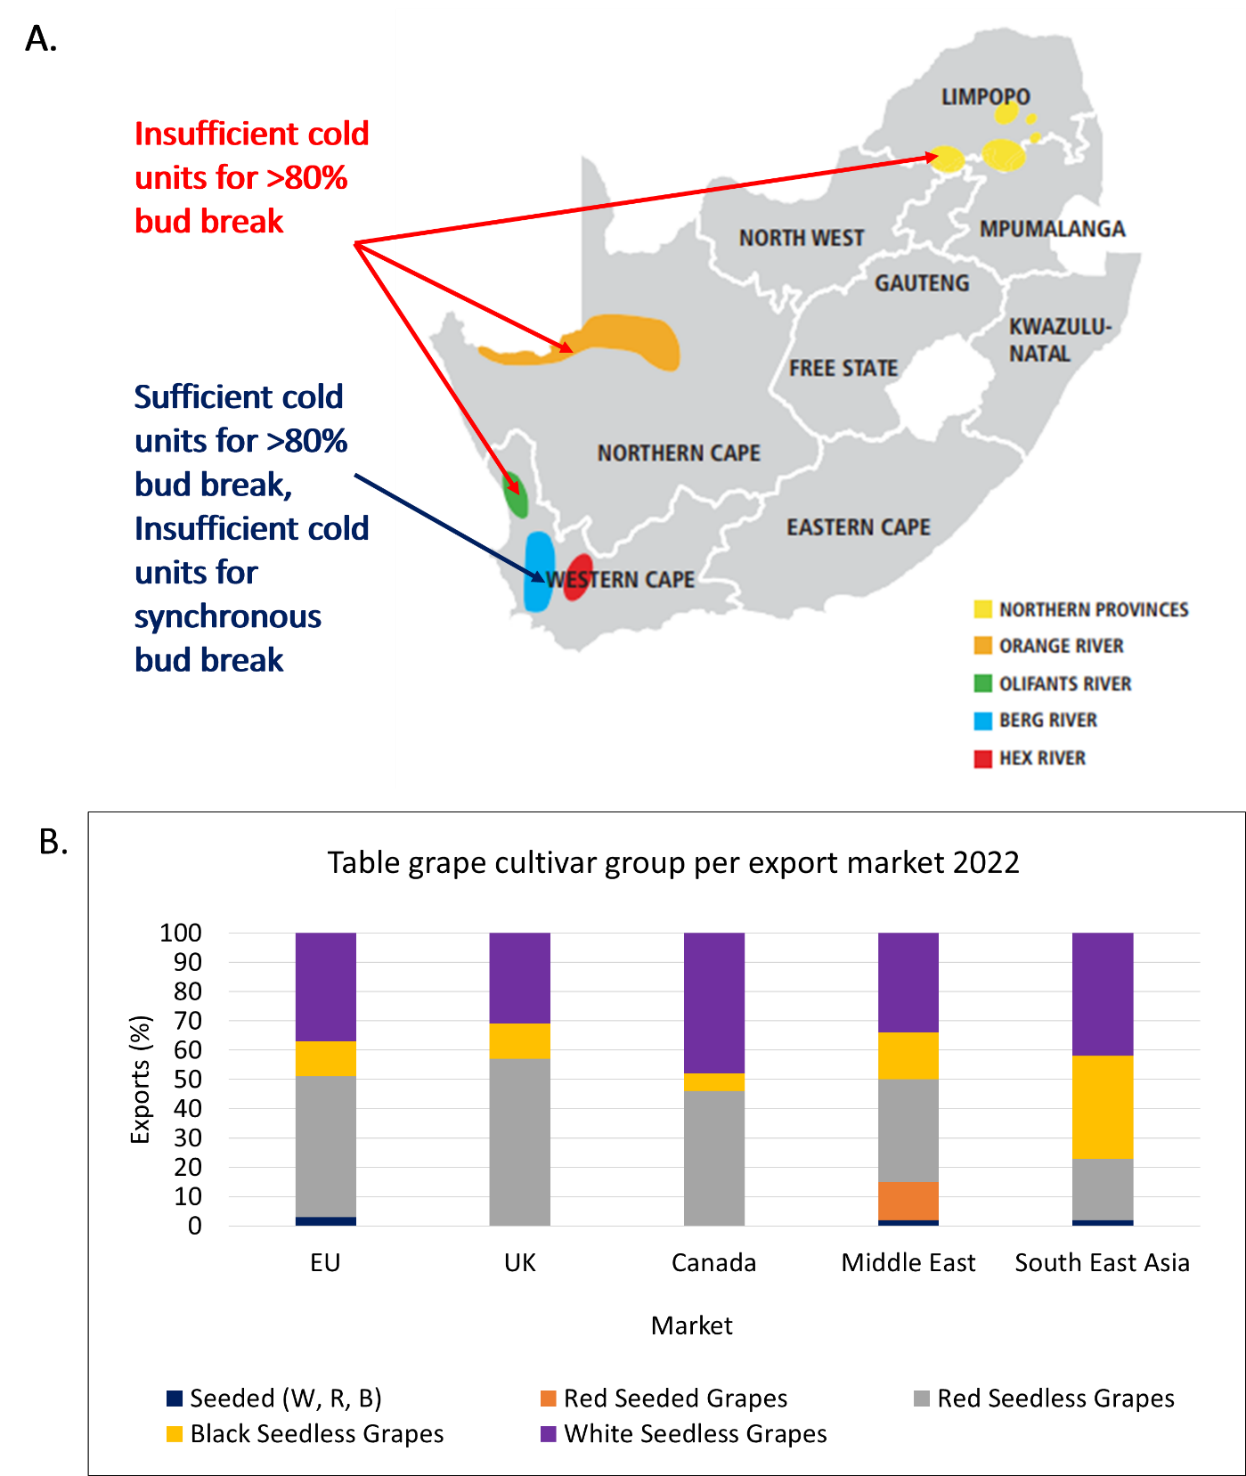


Figure S1 Information from the South African Table Grape Industry (SATI): A. South African table grape producing regions (image modified from SATI, 2018) and the effect of corresponding cold accumulation (Avenant & Avenant, 2014). B. Comparison of export grape cultivar group quantities amongst the five largest table grape export markets of South Africa (image taken from SATI, 2022).


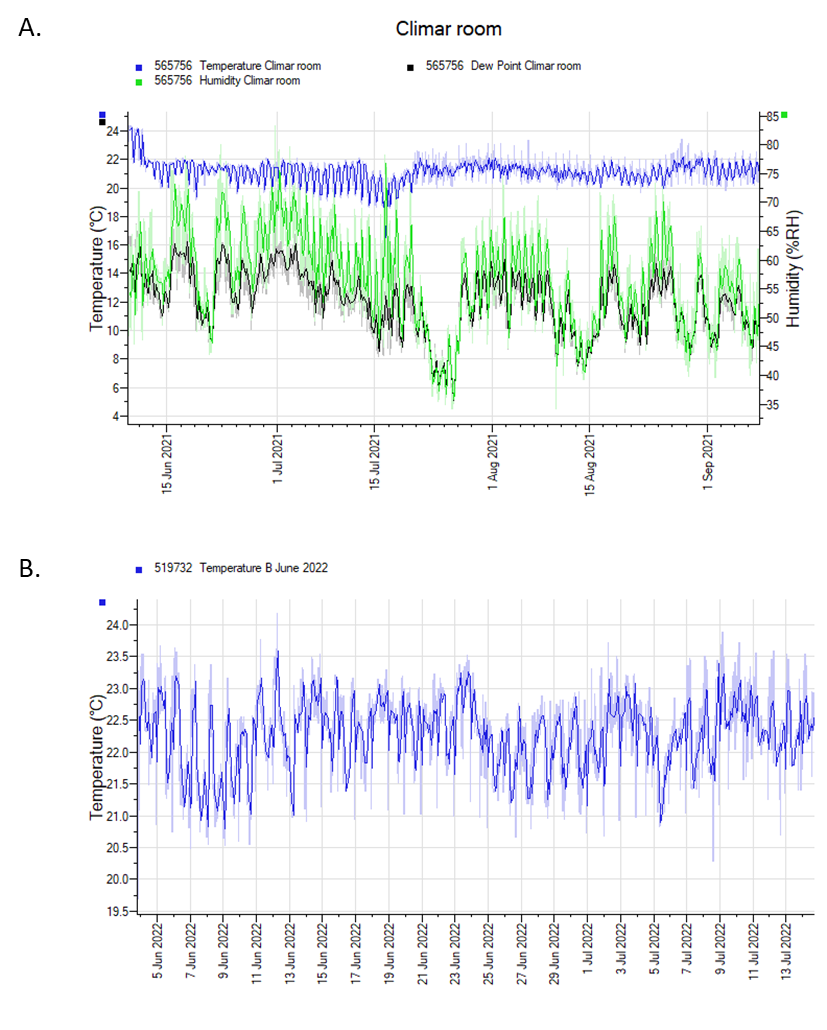


Figure S2 Example of growth room temperatures during glasshouse assays were maintained as approx. 22°C during A. 2021 and B. 2022 glasshouse dormancy-release assays.


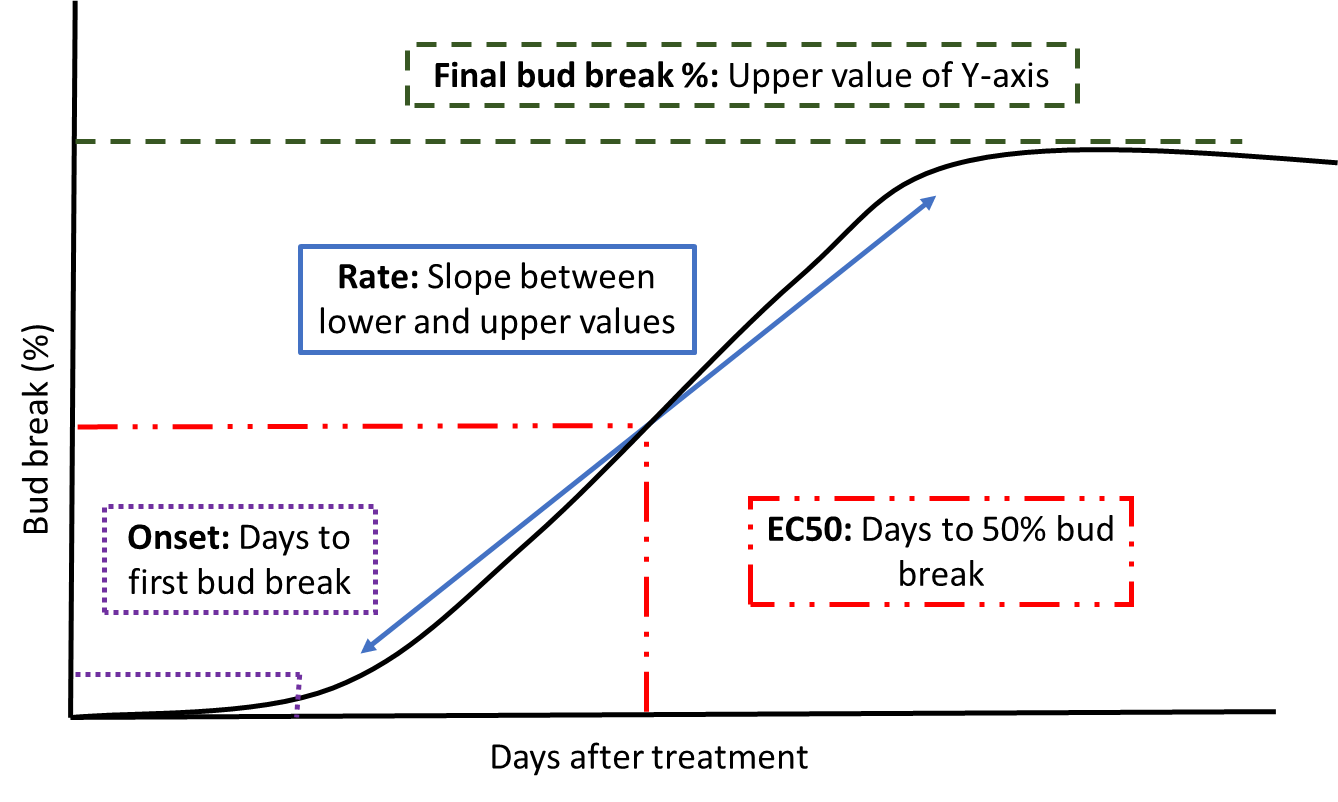


Figure S3 Visual representation and definitions of four parameters used to assess bud-break efficacy of all treatments tested in current study. These parameters are bud-break onset, rate, EC50, and final bud-break percentage.


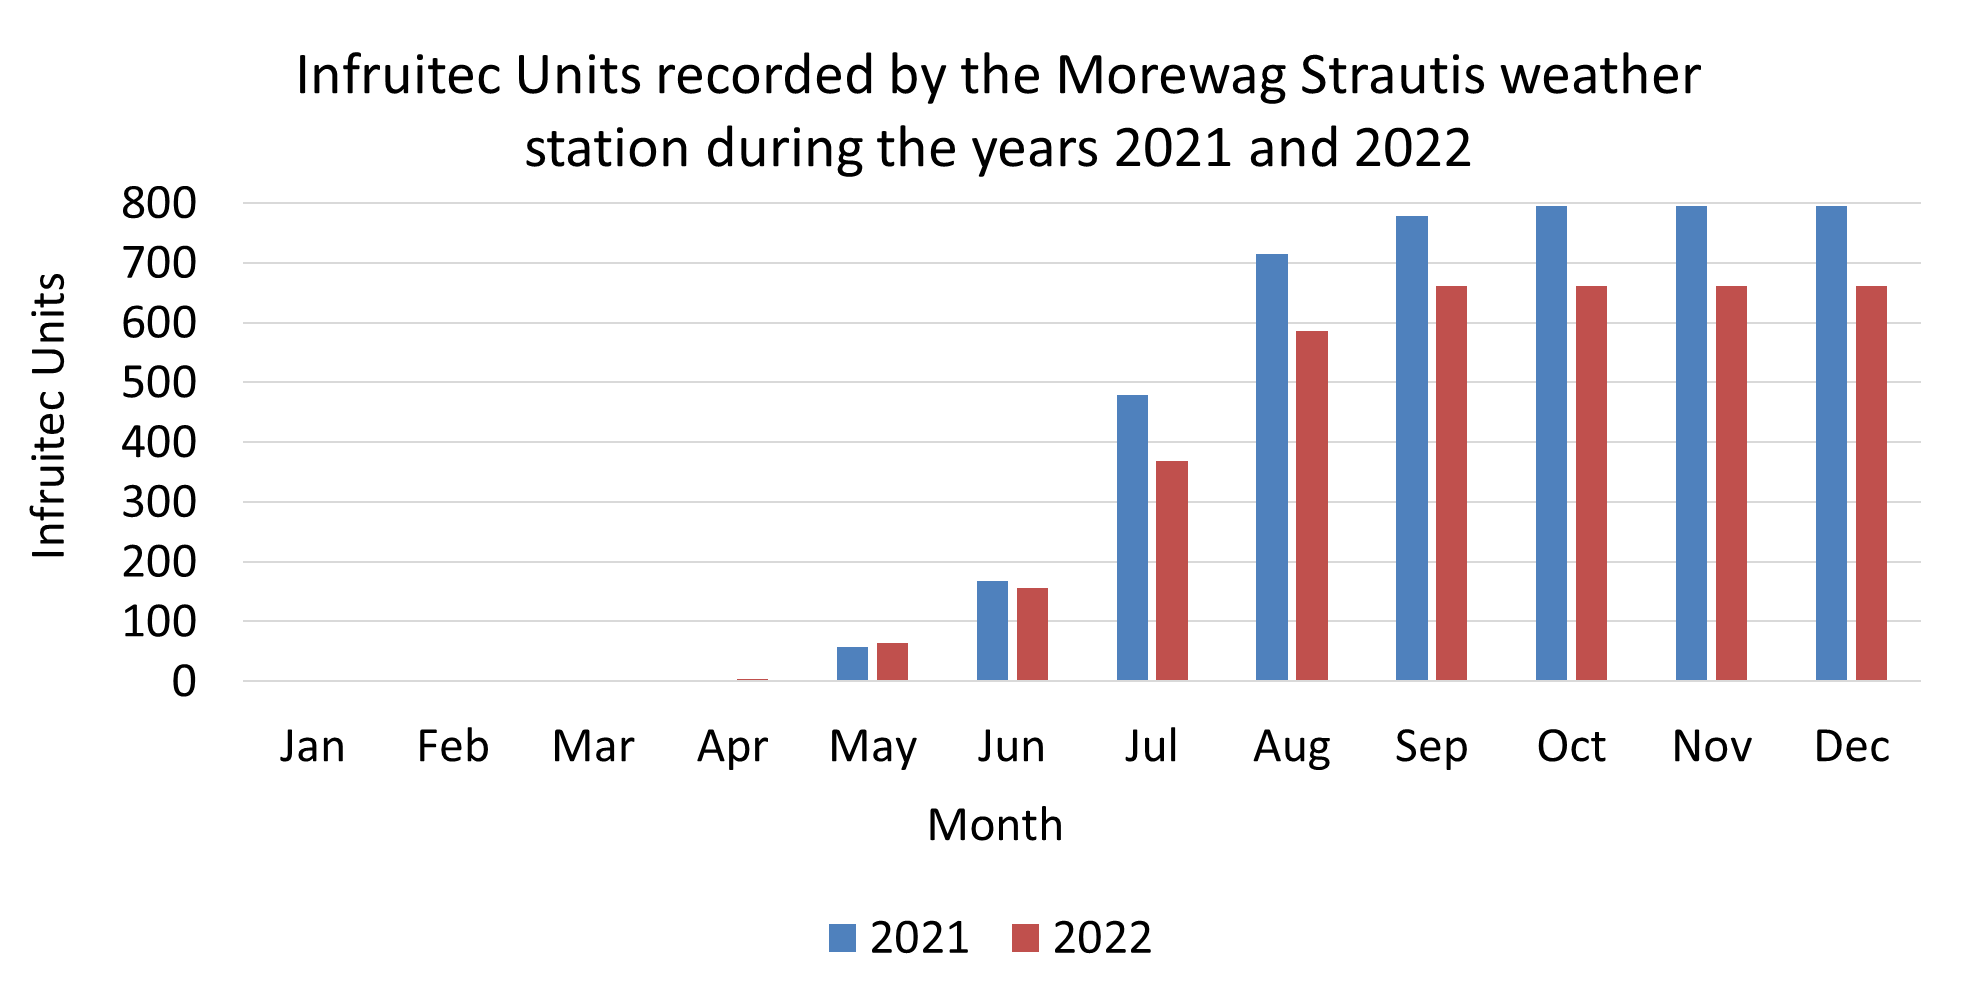


Figure S4 Infruitec units accumulated in the *Vitis vinifera* Crimson Seedless block on Windmeul farm, Paarl over two years.

Table S1 Summary of experiment dates and CU information for experiments evaluating the effects of HC 3%, MIX2, SNH, SNL, PBXH, PBXL, and dH2O, in in *V. vinifera* Crimson Seedless (CS) buds after, 100, 200 and 250 CUA.

| Final total CUA of SNCs | Date of sample collection | CUA of by canes at time of sample collection |
| --- | --- | --- |
| 100 | 10-Jun-22 | 95 |
| 200 | 30-Jun-22 | 160 |
| 250 | 12-Jul-22 | 245 |
